# Supplementary material for: Highly Sensitive Detection of Chemically Modified Thio-Organophosphates by an Enzymatic Biosensing Device: An Automated Robotic Approach
Source: PubMed Central journal article supplement (PMC7085774; doi:10.3390/s20051365), 2020-03-02
Supplement: sensors-20-01365-s001.pdf [file sensors-20-01365-s001.pdf]

# **Highly sensitive detection of chemically modified thio-organophosphates by an enzymatic biosensing device: an automated robotic approach.**

**Giovanni Paolo Cetrangolo<sup>1‡</sup>, Janis Rusko<sup>1,2‡</sup>, Carla Gori<sup>1</sup>, Paola Carullo<sup>1</sup>, Giuseppe Manco<sup>1\*</sup>, Marco Chino<sup>3§</sup>, Ferdinando Febbraio<sup>1§\*</sup>**

<sup>1</sup> Institute of Biochemistry and Cellular Biology – National Research Council (CNR), Via P. Castellino 111 80131 Naples, Italy

<sup>2</sup> Institute of Food Safety, Animal Health and Environment "BIOR", Lejupes street 3, LV-1076 - Riga, Latvia

<sup>3</sup> Department of Chemical Sciences, - University of Naples "Federico II". Via Cintia, 80126 Napoli, Italy

\* Correspondence: [ferdinando.febbraio@cnr.it](mailto:ferdinando.febbraio@cnr.it) +39 081 6132 611 (F.F.); [giuseppe.manco@cnr.it](mailto:giuseppe.manco@cnr.it) +39 081 6132 296 (G.M.)

‡ These authors contributed equally to manuscript (co-first authors).

§ These authors contributed equally to manuscript (co-last authors).

## **Table of contents**

**Supplementary Table S1**

**Supplementary Figure S1**

**Supplementary Figure S2**

**Supplementary Figure S3**

**Supplementary Table S1. MRM Transitions and Mass Spectrometry Settings**

| Analyte               | RT (min) | Q1 (Da) | Q2 (Da) | DP (V) | EP (V) | CE (V) | CXP (V) | Reference |
|-----------------------|----------|---------|---------|--------|--------|--------|---------|-----------|
| Paraoxon - methyl 1   | 7.2      | 248.1   | 90.1    | 71     | 10     | 37     | 16      | 1         |
| Paraoxon - methyl 2   | 7.2      | 248.1   | 202.1   | 71     | 10     | 27     | 10      | 1         |
| Paraoxon - ethyl 1    | 7.7      | 276.1   | 220.0   | 69     | 10     | 19     | 6       | 2         |
| Paraoxon - ethyl 2    | 7.7      | 276.1   | 248.1   | 69     | 10     | 13     | 6       | 2         |
| Phosmet 1             | 8.1      | 318.0   | 160.0   | 61     | 10     | 17     | 10      | 2         |
| Phosmet 2             | 8.1      | 318.0   | 133.0   | 61     | 10     | 49     | 11      | 2         |
| Parathion - methyl 1  | 8.2      | 264.0   | 125.0   | 85     | 10     | 25     | 8       | 3         |
| Parathion - ethyl 1   | 9.0      | 292.0   | 236.0   | 80     | 10     | 20     | 7       | 2         |
| Parathion - ethyl 2   | 9.0      | 292.0   | 264.0   | 80     | 10     | 15     | 7       | 2         |
| Coumaphos 1           | 9.2      | 363.0   | 227.0   | 100    | 10     | 36     | 10      | 2         |
| Coumaphos 2           | 9.2      | 363.0   | 307.0   | 100    | 10     | 25     | 10      | 2         |
| Tolclofos - methyl 1  | 9.7      | 301.0   | 268.9   | 59     | 10     | 23     | 6       | 2         |
| Tolclofos - methyl 2  | 9.8      | 301.0   | 175.0   | 59     | 10     | 35     | 6       | 2         |
| Diazinon 1            | 10.0     | 305.0   | 169.0   | 80     | 10     | 27     | 11      | 2         |
| Diazinon 2            | 10.0     | 305.0   | 153.0   | 80     | 10     | 28     | 11      | 2         |
| Pirimiphos - methyl 1 | 10.4     | 306.1   | 164.1   | 75     | 10     | 29     | 6       | 2         |
| Pirimiphos - methyl 2 | 10.4     | 306.1   | 108.0   | 75     | 10     | 40     | 6       | 2         |
| Chlorpyrifos 1        | 10.8     | 350.0   | 198.0   | 82     | 10     | 29     | 9       | 2         |

|                |      |       |      |    |    |    |   |   |
|----------------|------|-------|------|----|----|----|---|---|
| Chlorpyrifos 2 | 10.8 | 350.0 | 97.0 | 82 | 10 | 49 | 9 | 2 |
|----------------|------|-------|------|----|----|----|---|---|

**References:**

- (1) Fillâtre, Y.; Rondeau, D.; Daguin, A.; Jadas-Hecart, A.; Communal, P.-Y. Multiresidue Determination of 256 Pesticides in Lavandin Essential Oil by LC/ESI/SSRM: Advantages and Drawbacks of a Sampling Method Involving Evaporation under Nitrogen. *Anal. Bioanal. Chem.* **2014**, *406* (5), 1541–1550.
- (2) Wang, J.; He, Z.; Wang, L.; Xu, Y.; Peng, Y.; Liu, X. Automatic Single-Step Quick, Easy, Cheap, Effective, Rugged and Safe Sample Preparation Devices for Analysis of Pesticide Residues in Foods. *J. Chromatogr. A* **2017**, *1521*, 10–18.
- (3) Feng, X.; He, Z.; Wang, L.; Peng, Y.; Luo, M.; Liu, X. Multiresidue Analysis of 36 Pesticides in Soil Using a Modified Quick, Easy, Cheap, Effective, Rugged, and Safe Method by Liquid Chromatography with Tandem Quadruple Linear Ion Trap Mass Spectrometry. *J. Sep. Sci.* **2015**, *38* (17), 3047–3054.

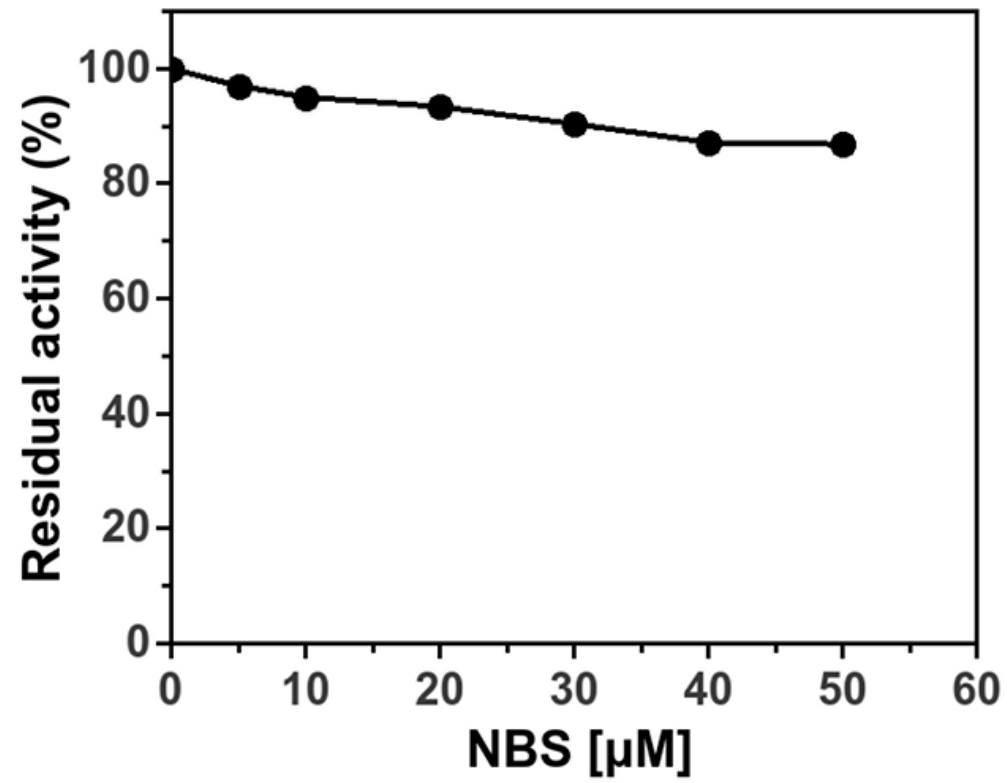

**Supplementary Figure S1.** Plot of EST2 residual activity in presence of increasing NBS concentration levels.

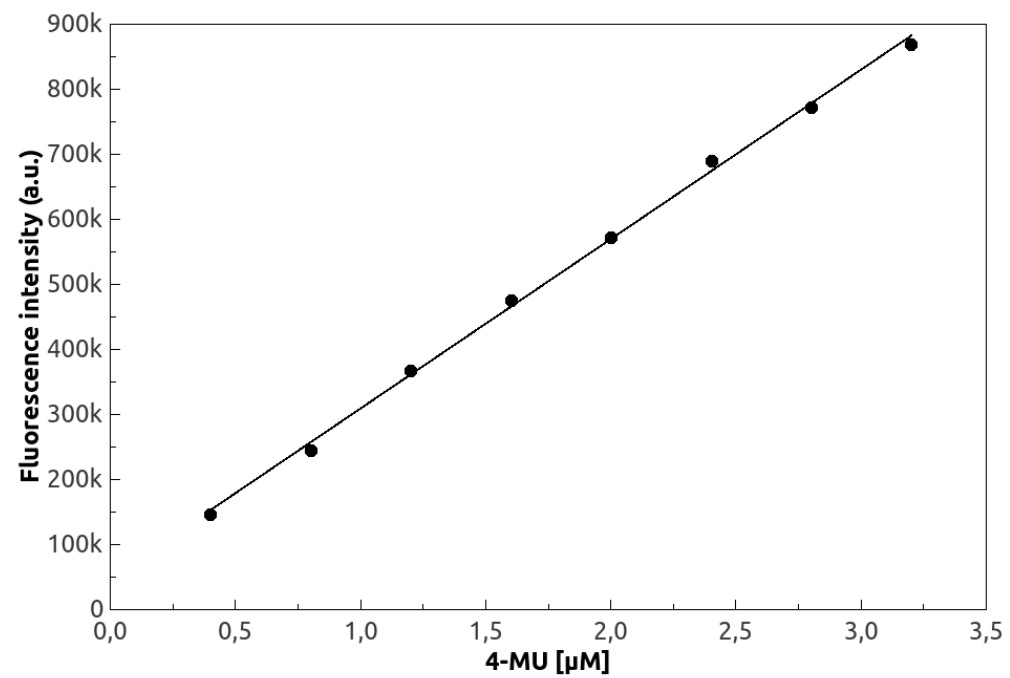

**Supplementary Figure S2.** Calibration curve of fluorescence intensity at increasing concentration levels of 4-MU in HEPES buffer, measured using the robotic workstation.

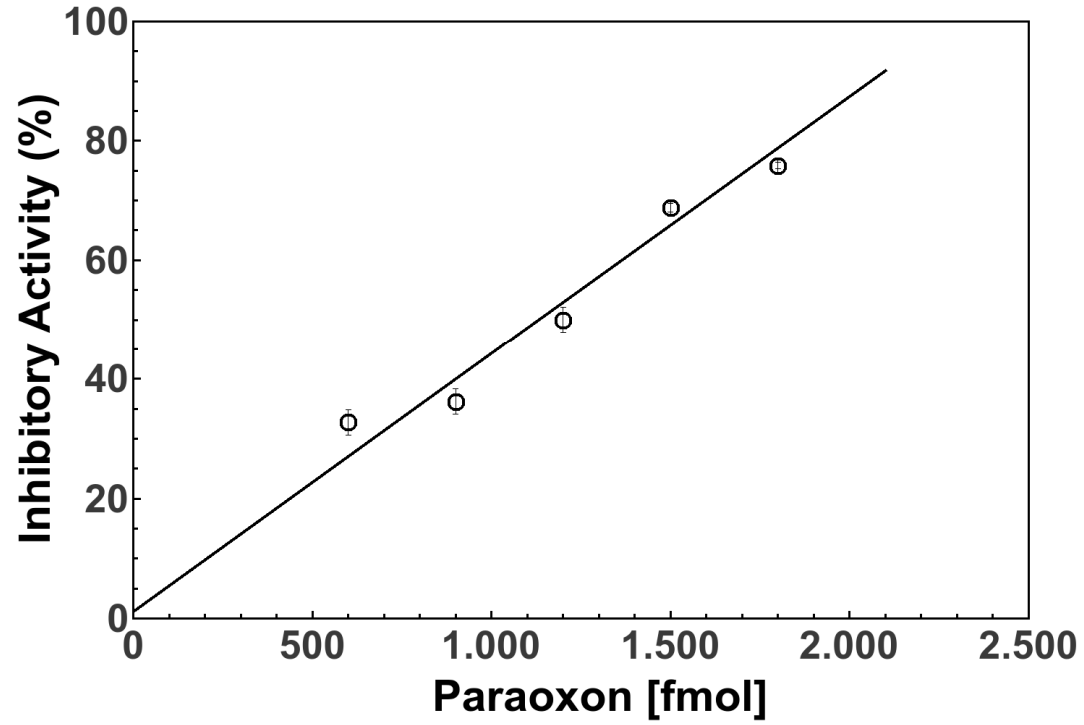

**Supplementary Figure S3.** Calibration curve of inhibitory activity at increasing concentration levels of Paraoxon in HEPES buffer in

p  
r  
e  
s  
e  
n  
c  
e

o  
f

e  
n  
z  
y
